# Supplementary material for: Analysis of mobile monitoring data from themicroAeth® MA200 for measuring changes in blackcarbon on the roadside in Augsburg
Source: Copernicus journal article supplement (doi:10.5194/amt-2020-517), 2021-02-16
Supplement: Supplementary file 1 [file amt-2020-517-supplement.pdf]

## Analysis of mobile monitoring data from the microAeth® MA200 for measuring changes in black carbon on the roadside in Augsburg

**Table S1** Comparative measurements of different MA200 in the fixed monitoring station (unit: ng/m<sup>3</sup>, N=5040 for each MA200, time resolution, 10 s).

|                 | 375 nm | 470 nm | 528 nm | 625 nm | 880 nm |
|-----------------|--------|--------|--------|--------|--------|
| MA200-0051      | 818    | 833    | 812    | 810    | 774    |
| MA200-0053      | 827    | 838    | 814    | 815    | 783    |
| MA200-0059      | 870    | 866    | 830    | 840    | 814    |
| MA200-0060      | 872    | 881    | 857    | 857    | 822    |
| MA200-0155      | 856    | 855    | 842    | 840    | 830    |
| MA200-0153      | 846    | 850    | 822    | 832    | 795    |
| MA200-0159      | 825    | 845    | 818    | 832    | 780    |
| Mean            | 844.9  | 852.6  | 827.9  | 832.3  | 799.7  |
| Stand deviation | 22.1   | 16.6   | 16.5   | 15.9   | 22.2   |

**Table S2** The reduction of the peak values number under different post-processing approaches (time resolution, 10 s).

| Measurement number | CMA (%) | LPR (%) | ONA (%) |
|--------------------|---------|---------|---------|
| 1                  | 71.43   | 57.14   | 33.33   |
| 2                  | 59.60   | 48.48   | 36.36   |
| 3                  | 55.81   | 41.86   | 32.56   |
| 4                  | 52.17   | 43.48   | 24.64   |
| 6                  | 61.54   | 46.15   | 53.85   |

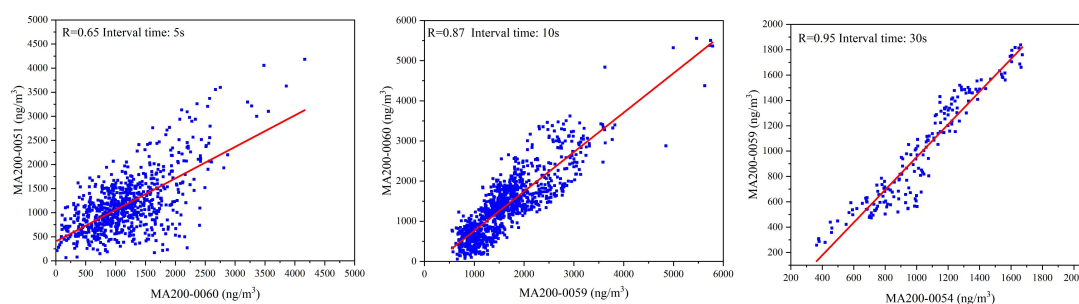

**Figure S1** Comparative measurements of two MA200 in mobile monitoring under different time resolution (unit: ng/m<sup>3</sup>, 2 h).

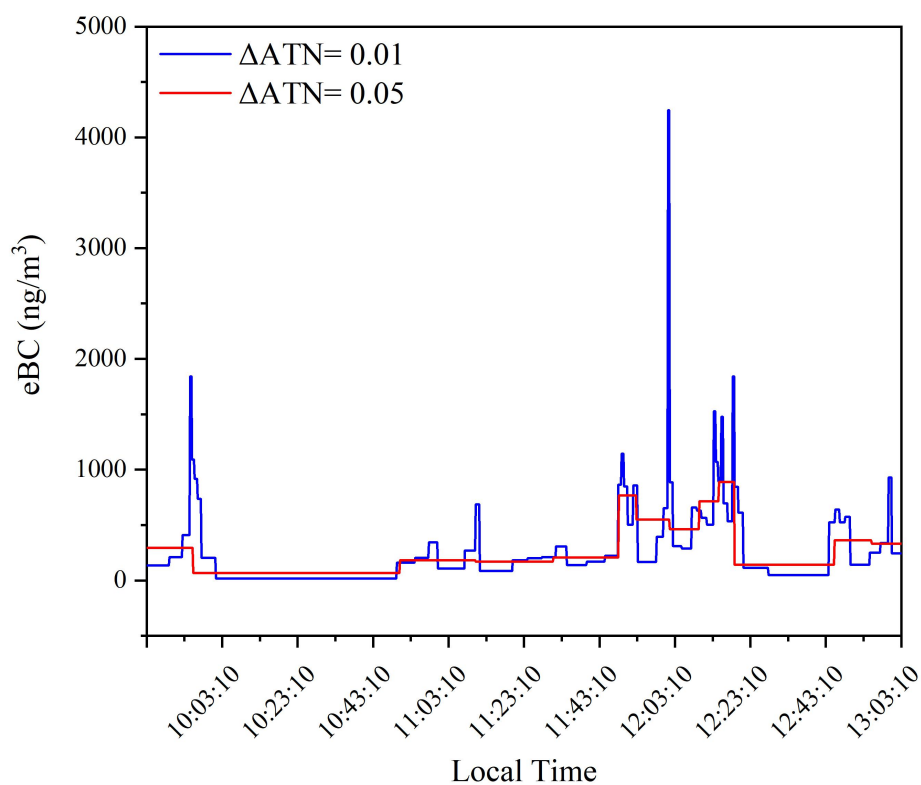

**Figure S2** The results of a sensitivity using different  $\Delta\text{ATN}$  values for mobile monitoring data (time resolution, 10 s).

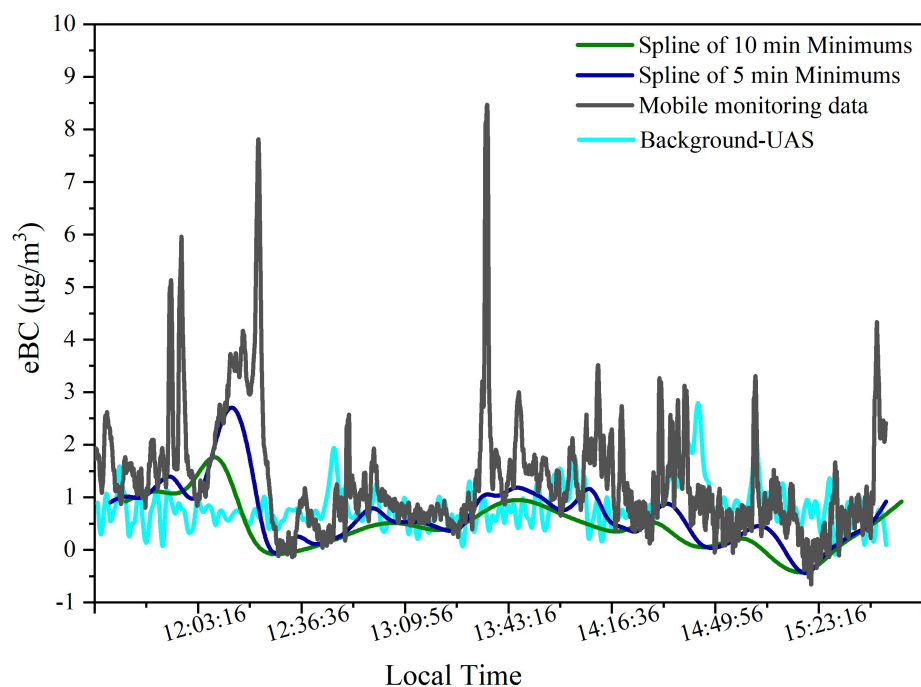

**Figure S3** Time series methods: spline of 5 min minimums and spline of 10 min minimums, and the BC concentration in the fixed station (UAS) (the analysis based on measurement 4).

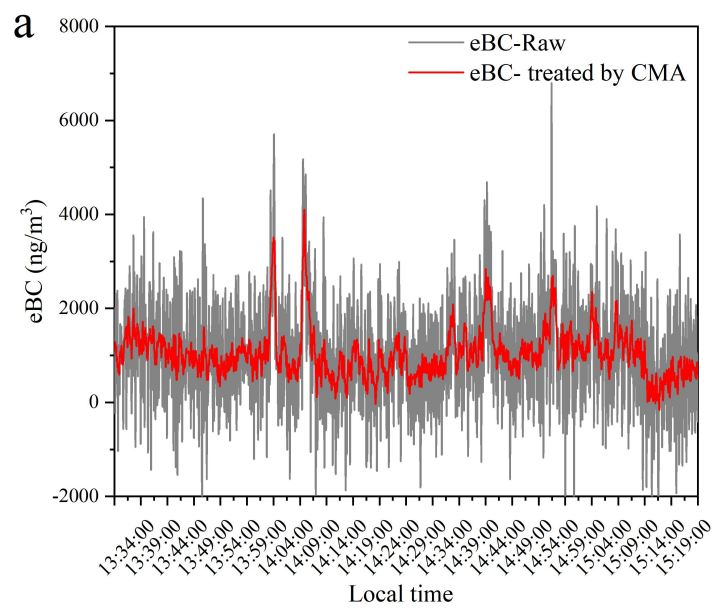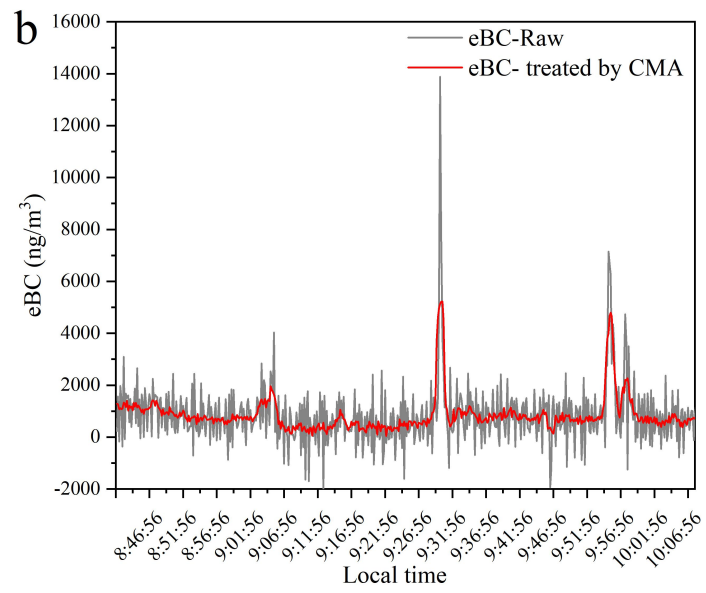

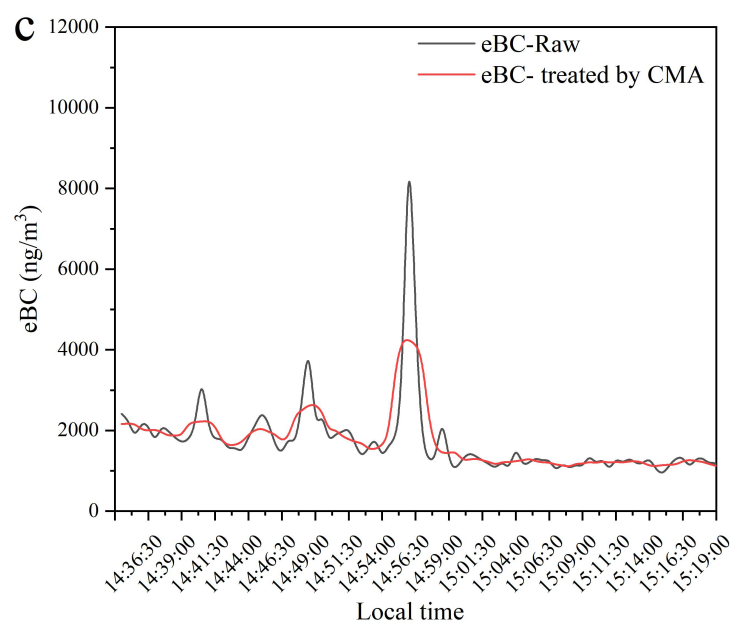

**Figure S4** Comparison between original BC measurements and corrections treated by CMA with the MA200 at sampling time bases of 5 s **(a)**, 10 s **(b)** and 30 s **(c)** in Munich (the analysis based on the measurement 8, 9, and 10).
